# Understanding the genetic and molecular pathogenesis of Friedreich's ataxia through animal and cellular models

Alain Martelli<sup>1,2,3,4,5,\*</sup>, Marek Napierala<sup>6</sup> and H el ene Puccio<sup>1,2,3,4,5,\*</sup>

In 1996, a link was identified between Friedreich's ataxia (FRDA), the most common inherited ataxia in men, and alterations in the gene encoding frataxin (*FXN*). Initial studies revealed that the disease is caused by a unique, most frequently biallelic, expansion of the GAA sequence in intron 1 of *FXN*. Since the identification of this link, there has been tremendous progress in understanding frataxin function and the mechanism of FRDA pathology, as well as in developing diagnostics and therapeutic approaches for the disease. These advances were the subject of the 4th International Friedreich's Ataxia Conference held on 5th-7th May in the Institut de G en etique et de Biologie Mol culaire et Cellulaire, Illkirch, France. More than 200 scientists gathered from all over the world to present the results of research spanning all areas of investigation into FRDA (including clinical aspects, FRDA pathogenesis, genetics and epigenetics of the disease, development of new models of FRDA, and drug discovery). This review provides an update on the understanding of frataxin function, developments of animal and cellular models of the disease, and recent advances in trying to uncover potential molecules for therapy.

## Introduction

Friedreich's ataxia (FRDA) is the most prevalent form of hereditary ataxia in Caucasians, accounting for 75% of ataxia with onset prior to 25 years of age (Cossee et al., 1997). It is a neurodegenerative disease characterized by progressive spinocerebellar and sensory ataxia with absence of deep tendon reflexes, dysarthria, pyramidal signs, muscular weakness and positive extensor plantar response (Harding, 1981; Pandolfo, 2009). Most of the neurological symptoms result from neurodegeneration in the dorsal root ganglia (DRG), with loss of large sensory neurons and posterior columns, followed by degeneration in the spinocerebellar and corticospinal tracts of the spinal cord. The dentate nucleus of the cerebellum is also affected, accounting for the cerebellar phenotype (Koeppen, 2011). Primary non-neurological manifestations of the disease include hypertrophic cardiomyopathy and increased incidence of diabetes (Harding and Hewer, 1983). Although the neuropathology has been the main focus of clinical research, understanding the pathological outcomes of the cardiac and metabolic phenotypes is

an emerging field. Early studies in individuals with FRDA showed that three main biochemical features characterize the pathophysiology: intracellular iron deposits (Lamarche et al., 1980), a deficit in mitochondrial iron-sulfur (Fe-S)-cluster-containing enzymes (aconitase and respiratory chain complexes I-III) (Rotig et al., 1997), and the presence of markers of oxidative damage in blood and urine samples (Emond et al., 2000; Schulz et al., 2000; Bradley et al., 2004).

The mutated gene in FRDA, which is localized on 9q21.11, encodes a small mitochondrial protein called frataxin (*FXN*) (Campuzano et al., 1996; Campuzano et al., 1997; Koutnikova et al., 1997). All individuals with FRDA carry an expansion of a GAA-triplet repeat in the first intron of the *FXN* gene. Most FRDA individuals are homozygous for this mutation, but a few patients (4%) are compound heterozygous for the GAA expansion and a different mutation (nonsense, missense, deletions, insertions), leading to loss of frataxin function (Campuzano et al., 1996; Cossee et al., 1999; Gellera et al., 2007). Normal chromosomes contain up to 40 GAA repeats, whereas disease-associated alleles contain 100-1000 GAA repeats, most commonly ~600-900. This GAA expansion leads to transcriptional silencing of *FXN* through a mechanism involving heterochromatinization of the locus, resulting in expression of a structurally and functionally normal frataxin but at levels that are estimated at ~5-30% of normal (reviewed in Gottesfeld, 2007; Schmucker and Puccio, 2010). As demonstrated in knockout animals, complete absence of frataxin leads to early embryonic death (Cossee et al., 2000). The other rare mutations in *FXN* that have been associated with FRDA lead to the production of nonfunctional or partially functional proteins (Correia et al., 2008). In most cases, compound heterozygous patients are indistinguishable from individuals who are homozygous for GAA expansions, although a few missense mutations (e.g. G130V, D122Y,

<sup>1</sup>Translational Medicine and Neurogenetics, IGBMC (Institut de G en etique et de Biologie Mol culaire et Cellulaire), 67404, Illkirch, France

<sup>2</sup>Inserm, U596, 67400, Illkirch, France

<sup>3</sup>CNRS, UMR7104, 67400, Illkirch, France

<sup>4</sup>Universit  de Strasbourg, 67000, Strasbourg, France

<sup>5</sup>Coll ge de France, Chaire de g en etique humaine, 67400, Illkirch, France

<sup>6</sup>The Department of Molecular Carcinogenesis, Center for Cancer Epigenetics, University of Texas MD Anderson Cancer Center Science Park, Smithville, TX, USA

\*Authors for correspondence (martelli@igbmc.fr; hpuccio@igbmc.fr)

  2012. Published by The Company of Biologists Ltd

This is an Open Access article distributed under the terms of the Creative Commons Attribution Non-Commercial Share Alike License (<http://creativecommons.org/licenses/by-nc-sa/3.0>), which permits unrestricted non-commercial use, distribution and reproduction in any medium provided that the original work is properly cited and all further distributions of the work or adaptation are subject to the same Creative Commons License terms.

R165P, L106S) cause atypical or milder clinical presentations (Cossee et al., 1999; Gellera et al., 2007).

The genetic basis of FRDA raises challenges for modeling the disease in other species. However, in the past 15 years, since the link between FRDA and *FXN* was identified, many models of FRDA have been generated that have enabled advances in understanding the function of frataxin, the pathophysiology of the disease, and some of the mechanisms implicated in GAA-based silencing and instability. Owing to its high evolutionary conservation, the effect of frataxin depletion has been modeled in diverse organisms, including yeast (Babcock et al., 1997; Foury and Cazzalini, 1997), invertebrates [*Caenorhabditis elegans* (Vazquez-Manrique et al., 2006; Ventura et al., 2006; Zarse et al., 2007) and *Drosophila* (Anderson et al., 2005; Llorens et al., 2007)] and mice (Puccio et al., 2001; Miranda et al., 2002; Al-Mahdawi et al., 2006). Yeast, invertebrates and the zebrafish (*Danio rerio*) have been shown to be well suited to the large-scale screening of drugs (Giacomotto and Segalat, 2010). However, owing to the complexity of the clinical phenotype of individuals with FRDA and the species specificity of certain fundamental pathways, mouse or mammalian cells are probably better suited to answer pathophysiological questions. Quite unexpectedly, generating mouse models using conditional approaches as well as GAA-based mouse models (Puccio et al., 2001; Miranda et al., 2002; Al-Mahdawi et al., 2006) was more successful than the design of stable cellular models using disease-relevant cell types. Current efforts in the FRDA field aim to generate better models that genetically reproduce the partial frataxin deficiency, mainly via the introduction of GAA-expansion-containing constructs in either mouse models or cells, or by the use of induced pluripotent stem cell (iPSC)-derived cells.

This Perspective discusses the current state of research in the field of FRDA based on published data as well as on the most recent results presented during the 4th International Friedreich's Ataxia Scientific Conference, held in May 2011 at the Institut de Génétique et de Biologie Moléculaire et Cellulaire, Illkirch, France. We begin by addressing current data and controversies regarding the role of frataxin in Fe-S cluster biogenesis, and then review the available mammalian models of the disease and advances in drug development for FRDA.

### Frataxin is a key player in Fe-S cluster biogenesis

Frataxin is a small globular protein localized in eukaryotic mitochondria; the function of frataxin remains unclear and quite controversial. Although published data indicate that frataxin might be a multifunctional protein involved in different mitochondrial pathways, recent data combining *in vitro* and *in vivo* approaches suggest that the role of frataxin in Fe-S cluster biogenesis defines the essential function of the protein. Fe-S clusters are small inorganic cofactors that are involved in many essential cellular pathways ranging from mitochondrial respiration and metabolic processes to DNA synthesis and repair (Lill, 2009).

Early *in vitro* studies of bacterial, yeast or human frataxin showed a low affinity for iron ( $\mu\text{M}$  range), with iron interacting with a conserved acidic ridge of the mature protein (Nair et al., 2004; Cook et al., 2006). Iron binding by frataxin *in vivo* under physiological conditions remains to be demonstrated. Early pathophysiological studies in a conditional mouse model reproducing the heart cardiomyopathy of FRDA (*MCK-Cre*; Table 1) pointed to a primary

involvement of frataxin in Fe-S cluster biogenesis (Puccio et al., 2001). Furthermore, phylogenetic studies predicted a role for frataxin in Fe-S cluster metabolism (Huynen et al., 2001). A role for frataxin in Fe-S cluster biogenesis was later confirmed in yeast depleted of the yeast homolog of frataxin (known as Yfh1) (Duby et al., 2002; Muhlenhoff et al., 2002).

De novo Fe-S cluster biogenesis is a highly conserved but still poorly characterized process that occurs in mitochondria in eukaryotes [see review from Lill (Lill, 2009) and commentary from Rouault in this issue of *Disease Models & Mechanisms* (Rouault, 2012)]. The first step of Fe-S cluster biogenesis involves the assembly of inorganic iron and sulfur into an Fe-S cluster on a scaffold protein, ISCU (Isu1 in yeast). In this process, the sulfur is provided through a persulfide intermediate by a cysteine desulfurase (comprising NFS1 and ISD11). The iron-dependent interaction of yeast frataxin with Nfs1 and Isu1 (Gerber et al., 2003), as well as *in vitro* reconstitution experiments showing the capacity of human frataxin to transfer iron to ISCU (Yoon and Cowan, 2003) and the capacity of CyaY (the bacterial homolog of frataxin) to provide iron for Fe-S cluster formation (Layer et al., 2006), led to the hypothesis that frataxin might be the iron donor for the assembly of the Fe-S cluster *in vivo*. Although controversial data regarding the direct frataxin protein partner were subsequently reported (Gerber et al., 2003; Layer et al., 2006; Shan et al., 2007; Li et al., 2009), very recent independent work using mammalian recombinant proteins reconciled the different results by showing that frataxin interacts with a preformed complex composed of NFS1, ISCU and ISD11 (Fig. 1) (Tsai and Barondeau, 2010; Schmucker et al., 2011). Furthermore, this interaction leads to increased cysteine desulfurase activity, suggesting that frataxin modulates the capacity of NFS1 to provide sulfur for Fe-S cluster formation (Tsai and Barondeau, 2010). In addition, although the presence of iron has been suggested to improve the activation of NFS1 cysteine desulfurase activity by frataxin (Tsai and Barondeau, 2010), the metal is not required for the interaction between frataxin and the ISCU-NFS1-ISD11 complex (Schmucker et al., 2011). Nuclear magnetic resonance (NMR) analysis of yeast homologs of frataxin suggested that the region of interaction with Isu1 encompasses the  $\alpha 1$ - $\beta 1$  region previously shown to bind iron *in vitro*, as well as a large section of the  $\beta$ -sheet of Yfh1 (Cook et al., 2010). These results are consistent with the region of interaction determined by mutagenesis experiments for mouse frataxin and the ISCU-NFS1-ISD11 complex (Schmucker et al., 2011). Furthermore, data using isothermal titration calorimetry (ITC) provided evidence that the interaction between yeast Yfh1 and Isu1 (in the absence of Nfs1-Isd11) depends on iron binding (Cook et al., 2010). Thus, the data from the yeast system suggest that the binding of iron to frataxin is part of the process leading to Fe-S cluster formation. However, the issue of how iron delivery and modulation of NFS1 activity are coordinated during Fe-S cluster formation still needs to be addressed.

Recent results obtained with the bacterial homologs bring further questions. Although CyaY, the bacterial homolog of frataxin, was shown to display a high affinity for the preformed IscS-IscU complex (as for the mammalian complex) (Prischi et al., 2010), *in vitro* reconstitution experiments indicated that CyaY displays an inhibitory effect on Fe-S cluster biogenesis rather than activating Fe-S cluster formation (as suggested for the mammalian proteins) (Adinolfi et

**Table 1. Animal and cellular models of FRDA**

| Model/genotype                                         | Notes/phenotype                                                                                                                                                                                                                                                                                                | References                         |
|--------------------------------------------------------|----------------------------------------------------------------------------------------------------------------------------------------------------------------------------------------------------------------------------------------------------------------------------------------------------------------|------------------------------------|
| <i>Fxn</i> -knockout mouse                             | Embryonic lethality during gastrulation (E6.5)                                                                                                                                                                                                                                                                 | Cossee et al., 2000                |
| <b>Conditional mouse models of <i>Fxn</i> deletion</b> |                                                                                                                                                                                                                                                                                                                |                                    |
| <i>MCK-Cre</i>                                         | Muscle creatine kinase promoter. <i>Fxn</i> deletion in heart and skeletal muscle. Reduced lifespan (76±10 days) and hypertrophic cardiomyopathy but no skeletal muscle phenotype. Early Fe-S cluster deficit and late mitochondrial iron accumulation. No sign of oxidative stress                            | Puccio et al., 2001                |
| <i>NSE-Cre</i>                                         | Neuron-specific enolase promoter. <i>Fxn</i> deletion in nervous system, heart and liver. Reduced lifespan (29±9 days). Severe neuronal and cardiac phenotype                                                                                                                                                  | Puccio et al., 2001                |
| <i>PrP-Cre<sup>ERT</sup></i>                           | Tamoxifen-inducible Cre, prion promoter. <i>Fxn</i> deletion in DRG and cerebellum. Progressive spinocerebellar and sensory ataxia. Neurodegeneration of sensory neurons in DRG and granular layer in cerebellum. Abnormal autophagy in DRG                                                                    | Simon et al., 2004                 |
| <i>Ins2-Cre</i>                                        | Insulin promoter. <i>Fxn</i> deletion in pancreatic β-cells; diabetes mellitus                                                                                                                                                                                                                                 | Ristow et al., 2003                |
| <i>ALB-Cre</i>                                         | Albumin promoter. <i>Fxn</i> deletion in hepatocytes. Tumor formation or liver regeneration?                                                                                                                                                                                                                   | Thierbach et al., 2005             |
| <b>Mouse models with GAA expansions in <i>Fxn</i></b>  |                                                                                                                                                                                                                                                                                                                |                                    |
| KIKI                                                   | Double knock-in with 230 GAA repeats. No overt phenotype. Transcriptional deregulation involving the PPARγ pathway. Markers of heterochromatin on the GAA tract                                                                                                                                                | Miranda et al., 2002               |
| KIKO                                                   | Simple knock-in crossed with knockout mouse. 26-32% residual frataxin expression. No overt phenotype. Transcriptional deregulation involving the PPARγ pathway                                                                                                                                                 | Miranda et al., 2002               |
| YG8R                                                   | YAC containing the full human <i>FXN</i> locus with a GAA expansion and deleted for endogenous murine frataxin. Progressive ataxia with affected DRG. No cardiopathy but mitochondrial iron accumulation and lipid peroxidation. Markers of heterochromatin on the GAA tract. Tissue-dependent GAA instability | Al-Mahdawi et al., 2006            |
| <b>Non-mammalian animal models</b>                     |                                                                                                                                                                                                                                                                                                                |                                    |
| <i>Drosophila melanogaster</i>                         | Generated using RNAi to knock down <i>Fxn</i> expression. Reduced lifespan, Fe-S cluster and heme deficit, sensitivity to oxidative stress, climbing defect. Catalase or peroxiredoxin overexpression does not rescue the phenotype in larvae, but partially rescues the phenotype in the adult fly            | Anderson et al., 2005              |
| <i>C. elegans</i>                                      | Generated using RNAi to knock down <i>FXN</i> expression. Controversial results depending on experimental procedures                                                                                                                                                                                           | Ventura et al., 2006               |
| Zebrafish                                              | Generated using antisense strategies to knock down <i>fxn</i> expression. Affects development of several tissues (e.g. ear, spinal motor neurons) depending on frataxin depletion level                                                                                                                        | Constantin Yanicousta <sup>a</sup> |
| <b>Cellular models</b>                                 |                                                                                                                                                                                                                                                                                                                |                                    |
| <i>Escherichia coli</i>                                | Deletion of CyaY does not lead to an overt phenotype                                                                                                                                                                                                                                                           | Li et al., 1999                    |
| <i>Saccharomyces cerevisiae</i>                        | Deletion of Yfh1 leads to Fe-S cluster deficit, mitochondrial iron accumulation and increased sensitivity to oxidative stress                                                                                                                                                                                  | Foury and Cazzalini, 1997          |
| Patient-derived fibroblasts or lymphoblasts            | ~20-30% residual frataxin expression. No observed phenotype in normal culture conditions. High variability                                                                                                                                                                                                     | Rotig et al., 1997                 |
| RNAi-based models                                      | Many different cell lines. Variable residual frataxin expression. Fe-S cluster deficit, cell proliferation defect, cell death                                                                                                                                                                                  | Santos et al., 2001                |
| Humanised murine fibroblasts                           | Murine fibroblasts deleted for endogenous frataxin and expressing human frataxin with missense mutation (G130V, I154F or N146K). Fe-S cluster deficit, mitochondrial iron accumulation and/or deposits, sensitivity to oxidative stress                                                                        | Calmels et al., 2009               |
| iPSC-derived cells                                     | Patient-derived iPSCs show decreased <i>FXN</i> expression and markers of heterochromatin at the GAA expansion. GAA expansion instability was observed in iPSCs. Protocols to obtain specific neuronal populations and cardiomyocytes are currently being developed                                            | Ku et al., 2010                    |

<sup>a</sup>Personal communication, as presented at the 4th International Friedreich's Ataxia Conference (<http://www.curefa.org/conference.html>).

al., 2009). Moreover, in stoichiometric conditions, CyaY was found to decrease IscS enzymatic activity in the presence of IscU, thus indicating that the effect of CyaY on IscS activity is opposite to that in the mammalian system (Iannuzzi et al., 2011). The reasons for

such differences and the consequences of such activation or inhibition on the capacity of the complex to form Fe-S clusters must be further investigated. New in vitro biochemical experiments as well as three-dimensional structure determination of the eukaryotic and bacterial

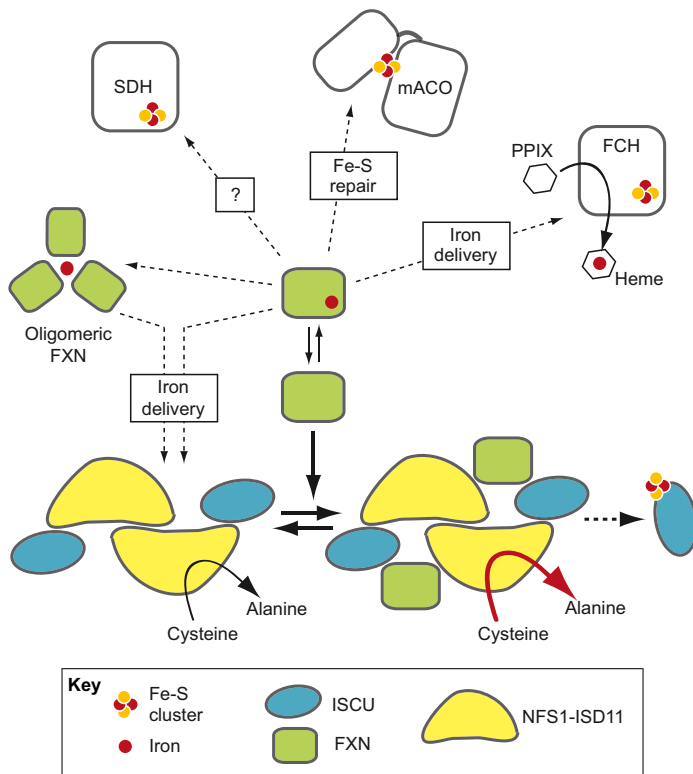

**Fig. 1. Frataxin is a mitochondrial protein with a key role in Fe-S cluster biogenesis.** Over the past 10 years, frataxin has been proposed to be a multifunctional protein involved in providing iron to various mitochondrial proteins (represented by dashed arrows), including succinate dehydrogenase (SDH), mitochondrial aconitase (mACO) and ferrochelatase (FCH), as well as for Fe-S cluster biogenesis, which involves the cysteine desulfurase NFS1-ISC11 and the scaffold protein ISC. SDH, mACO and FCH are Fe-S-containing proteins in mammals. Frataxin has also been proposed to form oligomeric structures that can store iron. In vitro, both monomeric and oligomeric forms of frataxin can provide iron for Fe-S cluster biogenesis. More recently, the existence of multiple frataxin protein partners, as well as the role of the oligomeric form of frataxin in vivo, were questioned (see text). Indeed, a tight and stable iron-independent complex between monomeric frataxin and the ISC/NFS1-ISC11 complex was isolated (represented by solid arrows), and the ability of frataxin to form this complex was shown to correlate with the essential frataxin function in vivo (Tsai and Barondeau, 2010; Schmucker et al., 2011). Furthermore, these studies showed that, on frataxin binding, the cysteine desulfurase activity of the ISC/NFS1-ISC11 complex is increased (red arrow), and Fe-S cluster biogenesis on ISC is enhanced, suggesting that frataxin is a key modulator of de novo Fe-S cluster formation in vivo. PPIX, protoporphyrin IX.

complexes using X-ray crystallography will bring additional and complementary valuable information that will enable a better understanding of the role of frataxin in Fe-S cluster biogenesis. Recently, a point mutation in the *Isu1* gene (M107I) was found to partially rescue the  $\Delta Yfh1$  yeast model, pointing again to the role of frataxin in the early steps of Fe-S cluster biogenesis (Yoon et al., 2012). Further molecular and biochemical studies aimed at understanding how this point mutation affects the activity of the *Isu1-Nfs1-Isd11* complex in the absence of frataxin should bring new insights concerning the role of frataxin.

The finding that frataxin affects NFS1 activity opened up the possibility to assess the functional consequences of missense

mutations identified in individuals with FRDA. Four different classes of frataxin mutations were identified on the basis of their biochemical properties (Bridwell-Rabb et al., 2011; Tsai et al., 2011): (1) variants that affect both frataxin binding to the ISC/NFS1-ISC11 complex and its cysteine desulfurase activity (Q153A, W155R); (2) variants that display weak binding but have only a mild reduction in their capacity to activate NFS1 (R165C, N146K, W155A); (3) variants for which binding is not markedly affected but that show a substantial defect in their activation of cysteine desulfurase (Q148R); and (4) variants that display modest defects in both binding and activation (W155F, N146A, Q148G, I154F). These results show that missense mutations affecting the function of frataxin through different biochemical mechanisms can ultimately lead to a similar phenotype. In the future, it would be interesting to assess how variants that lead to atypical disease (G130V, D122Y, R165P, L106S) (Cossee et al., 1999; Gellera et al., 2007) affect the process of Fe-S cluster formation.

In addition to its clear role in Fe-S cluster biogenesis, data suggest that frataxin might be a multifunctional protein involved in providing iron through direct protein-protein interaction to various mitochondrial proteins (Fig. 1), including mitochondrial aconitase (Bulteau et al., 2004), ferrochelatase (He et al., 2004; Yoon and Cowan, 2004) and succinate dehydrogenase (Gonzalez-Cabo et al., 2005). The relevance of these interactions has, however, recently been questioned because different approaches were unable to identify or reproduce some of the previously described interactions (Schmucker et al., 2011) [Annalisa Pastore, personal communication, as presented at the 4th International Friedreich's Ataxia Conference (<http://www.curefa.org/conference.html>)]. Although we cannot exclude that these interactions occur in specific experimental or cellular conditions, further in vivo experiments using the 'humanized' murine fibroblasts model (see below) showed a clear correlation between the capacity of frataxin to interact with the ISC/NFS1-ISC11 complex and cellular viability, thus pointing to the essential function of frataxin in Fe-S cluster biogenesis in vivo (Schmucker et al., 2011). Therefore, the potential involvement of frataxin in other mitochondrial pathways needs to be further validated through complementary in vivo approaches.

Frataxin has been shown to form oligomers in the presence of iron in vitro (Adamec et al., 2000) (Fig. 1). The formation and function of oligomeric frataxin in vivo is, however, still a matter of debate. In vitro reconstitution experiments showed that the oligomeric bacterial and mature yeast frataxins could provide iron for Fe-S cluster formation on *IscU-Isu1* (Layer et al., 2006; Li et al., 2009). Mammalian frataxin is synthesized in the cytosol as a precursor form (FXN<sub>1-210</sub>) that is targeted to mitochondria and processed in two steps in the mitochondrial matrix to give an intermediate form (FXN<sub>42-210</sub>) and, subsequently, the mature form of frataxin (FXN<sub>81-210</sub>) (Condo et al., 2007; Schmucker et al., 2008). More recently, the oligomeric form of the intermediate human frataxin was shown to efficiently provide iron for Fe-S cluster formation using recombinant NFS1-ISC11 and ISC (Gakh et al., 2010). However, the presence of a frataxin oligomer is not compatible with the determined molecular mass of the frataxin-ISC/NFS1-ISC11 complex in vitro (Tsai and Barondeau, 2010; Schmucker et al., 2011). Furthermore, in mammals, mature frataxin was shown to be unable to form oligomers (Prischi et al., 2009).



Bypassing the formation of the intermediate human frataxin *in vivo* using 'humanized' murine fibroblasts deleted for endogenous frataxin does not prevent the rescue of cellular viability, thus indicating that the formation of oligomers is not a requisite for frataxin to be functional (Schmucker et al., 2011). We cannot exclude, however, that an oligomeric form of frataxin is of particular importance in specific cellular conditions that have yet to be determined.

Understanding the function of frataxin is crucial to unraveling the cellular consequences of its depletion *in vivo*. A key function of frataxin in Fe-S cluster biogenesis has now been clearly pointed out, but how its role in this essential cellular pathway correlates with the pathophysiology of FRDA needs to be further investigated through the study of well-characterized animal and cellular models of the disease. During the last 10 years, different approaches in cells, mice and non-mammalian organisms have been pursued to obtain such models.

## Investigating the pathophysiology of FRDA using mouse models

### Conditional knockout models

The complete knockout of *Fxn* in mice is lethal (Cossee et al., 2000) (Table 1). Similarly, the complete deletion of *Fxn* in proliferating cells is not viable (Calmels et al., 2009). The first viable mouse models of FRDA were generated using conditional approaches using the *Cre-loxP* recombination system to perform deletion of *Fxn* exon 4 from a conditional floxed allele (*Fxn*<sup>L3</sup>) using tissue-specific, or tissue-specific and inducible, Cre mouse lines. Cardiac-specific (*MCK-Cre*) and neuronal (*NSE-Cre*, *Prp-CreER*<sup>T</sup>) models of FRDA were obtained (Puccio et al., 2001; Simon et al., 2004) (Table 1). Together, these models reproduce most of the characteristic features of the disease, including hypertrophic cardiomyopathy, progressive spinocerebellar and sensory ataxia. Time-dependent molecular and functional dissection of the *MCK-Cre* mouse model showed that frataxin deficiency primarily affects Fe-S cluster-containing enzymes (Puccio et al., 2001). The Fe-S cluster deficit is observed before the first evidence of cardiac dysfunction, and before the characteristic mitochondrial iron accumulation. Echocardiography demonstrated that *MCK-Cre* mice develop a progressive left ventricular hypertrophy that rapidly associates with geometric remodeling (dilatation) leading to cardiac failure, consistent with the natural history of the human disease (Seznec et al., 2004; Regner et al., 2011). Interestingly, no evidence of oxidative damage was observed in this model, suggesting that the formation of reactive oxygen species (ROS) is not essential in the early onset of the disease (Seznec et al., 2005).

The *NSE-Cre* model develops a movement disorder characterized by gait abnormalities and loss of proprioception, as well as cardiac disease (Puccio et al., 2001). However, the severity of this model and the non-specific neurological lesions (spongiform cortical lesions) compromise the use of this model for neuropathophysiological studies.

The tamoxifen-inducible *Prp-CreER*<sup>T</sup> neuronal model showed that the spinocerebellar and sensory ataxia developed by the mice result from progressive degeneration of the posterior and Clarke's columns of the spinal cord, as well as degeneration of large sensory neurons in DRG (Simon et al., 2004). A time course experiment in these mice suggested that lesions observed in DRG neurons are a

primary event, whereas neuronal loss in the Clarke's column and the posterior column are secondary. These features are reminiscent of the changes observed in individuals with FRDA (Koeppen, 2011). In addition, although there was no evidence of apoptosis, an abnormal autophagic process (leading to the formation of lipofuscin and of large vacuoles within large sensory neurons) was observed in the *Prp-CreER*<sup>T</sup> mice (Simon et al., 2004), suggesting that impaired autophagy is a key process in the neurodegeneration.

Conditional models lacking *Fxn* primarily in the pancreas (*Ins2-Cre*; Table 1) were generated to model the pathophysiology of diabetes mellitus associated with FRDA (Ristow et al., 2003) (Table 1). These mice showed a slowly progressive reduction in the number of pancreatic islets, resulting in an impaired insulin response to glucose and subsequent diabetes. Frataxin-deficient  $\beta$ -cells exhibit increased apoptosis and a reduced proliferation rate (Ristow et al., 2003). However, whether the described phenotype observed in *Ins2-Cre* mice reproduces the pathological mechanism that occurs in individuals with FRDA needs to be further investigated through complementary studies in the mouse model and in patients.

To understand the function of frataxin in different tissues, and the tissue specificity of the FRDA phenotype, mouse lines with deletion of *Fxn* in non-diseased tissues have been generated. The observation of tumor-like lobules in a liver-specific deletion of *Fxn* (*ALB-Cre*; Table 1) suggested that frataxin might be a tumor suppressor (Thierbach et al., 2005; Thierbach et al., 2010; Thierbach et al., 2012). However, revisiting the status of frataxin deletion and the phenotype associated with the *ALB-Cre* mice provides a different interpretation. In fact, the formation of lobules in the liver, which is associated with increased lifespan, seemed to be the consequence of liver regeneration from ALB-naive precursors expressing frataxin (Diaz et al., 2008; Iverson et al., 2011) (A.M. and H.P., unpublished data). Thus, the suggested tumor suppressor role of frataxin should be considered with care. Consistent with this observation, data from a large cohort of individuals with FRDA did not demonstrate an increased tumor incidence in these individuals [David R. Lynch, personal communication, as presented at the 4th International Friedreich's Ataxia Conference (<http://www.curefa.org/conference.html>)].

### GAA-based mouse models

Although conditional knockout mice are powerful tools to reproduce the disease pathophysiology in heart and the nervous system, and to test some therapeutic approaches, they do not perfectly mimic the human disease. In individuals with FRDA, the presence of a GAA expansion on at least one *FXN* allele leads to low levels of structurally normal frataxin (Campuzano et al., 1996). The progressive disease thus results from the presence of a residual amount of frataxin throughout life, rather than a sudden and complete frataxin deficit (as triggered by the conditional knockout mouse approach). Furthermore, the genetics of GAA expansions might contribute to disease development, possibly by having a role in tissue specificity owing to the intrinsic somatic instability of long GAA tracts (see Box 1). In addition, GAA-based mouse models are needed to unravel the molecular and cellular mechanisms associated with GAA-mediated silencing of the *FXN* gene *in vivo* (see Box 2) as well as for the therapeutic evaluation of drug candidates that might target this process.

GAA-based mouse models were obtained using either a knock-in approach based on homologous recombination or a human genomic yeast artificial chromosome (YAC) transgenic approach. Homozygous 230 GAA-repeat-expansion knock-in mice (KIKI) show a 25% decrease in frataxin expression, whereas the compound heterozygous knock-in–knockout mice (KIKO) express 25–35% of wild-type frataxin levels (Miranda et al., 2002) (Table 1). No overt phenotype was observed in the KIKO mice, suggesting that the transcriptional decrease does not reach the critical frataxin threshold required to induce pathology. However, transcriptome analysis of both KIKI and KIKO mice revealed significant transcriptional modifications in these mice compared with control mice (Coppola et al., 2009). In particular, the PPAR $\gamma$  pathway was affected (i.e. PGC1 $\alpha$  was downregulated) in liver and muscle samples. However, controversial data regarding dysregulated PGC1 $\alpha$  expression in patient fibroblasts (Marmolino et al., 2010; Garcia-Gimenez et al., 2011) have recently been reported, showing that further studies are needed to understand the link between frataxin deficiency and metabolic control. Although this link still needs to be defined, the cellular mechanisms involved might be of particular interest when trying to understand the development of diabetes mellitus in individuals with FRDA.

Two lines of human genomic YAC FRDA transgenic mice (YG22 and YG8) that contain unstable GAA-repeat expansions (GAA<sub>190</sub> and GAA<sub>190+90</sub>, respectively), within the appropriate genomic context, rescue the embryonic lethality of the knockout by expressing only human frataxin (Al-Mahdawi et al., 2006). The YG8 rescued mice,

referred to as YG8R (Table 1), exhibit reduced expression of human frataxin protein and display mildly impaired motor coordination ability, with evidence of large neurodegeneration vacuoles in the DRG and decreased aconitase activity in the cerebellum. These features are reminiscent of those observed in *NSE-Cre* and early-stage *Prp-CreER<sup>T</sup>* mice (Puccio et al., 2001; Simon et al., 2004). No severe heart dysfunction was observed in YG8R mice. However, decreased aconitase activity, mitochondrial iron accumulation and signs of lipid peroxidation suggestive of ROS formation were found in heart tissue (Al-Mahdawi et al., 2006). Microarray analysis carried out on DRG from YG8R mice showed that the expression of thiol-related proteins (e.g. thioredoxin reductase, peroxiredoxins) was impaired in affected mice compared with controls [Robert Schoenfeld, personal communication, as presented at the 4th International Friedreich's Ataxia Conference (<http://www.curefa.org/conference.html>)]. Although the role of this pathway in the pathophysiology still needs to be clearly defined, the hypothesis was raised that excessive thiol oxidation is a key feature leading to demyelination and neurodegeneration in YG8R mice.

Generating adequate GAA-based models that lead to the development of an FRDA phenotype in a mouse is not an easy task. The main difficulties lie in the length of the GAA expansion needed to induce pathogenesis and the locus of genomic integration, as well as the intrinsic GAA instability that can result in contraction or elongation of the expansion. Both KIKI and YG8R mice are powerful tools to study the mechanisms involved in GAA-mediated silencing and GAA somatic instability (YG8R) (see Boxes 1 and 2). To obtain new mouse models with a more severe phenotype, current efforts are being made to increase the size of the GAA expansion within the human *FXN* transgene. Furthermore, bacterial artificial chromosomes (BACs) that can accommodate the full *FXN* locus with larger GAA expansions are currently being generated. These constructs will certainly be valuable tools for developing new mouse models.

### Box 1. Mechanism of somatic instability of GAA expansions

Work with patient samples and GAA-based models has provided evidence of age-dependent, tissue-specific somatic instability and intergenerational instability of the expanded GAA repeats in FRDA (Montermini et al., 1997; Sharma et al., 2002; Pollard et al., 2004; De Biase et al., 2006). An increase in the repeat size might be an important contributor to the pathology of the disease because the size of the repeat expansion correlates with the extent of *FXN* expression impairment. Hence, preventing expansion of the GAA repeats represents a potential therapeutic goal for FRDA. In FRDA iPSCs, a high occurrence of both GAA repeat expansions and contractions were reported (Ku et al., 2010; Liu et al., 2011). GAA instability was reported to be dependent on increased activity of the mismatch repair system (especially Msh2) during the reprogramming and subsequent culturing of FRDA iPSCs (Ku et al., 2010). Interestingly, mismatch repair proteins were also found, using chromatin immunoprecipitation (ChIP), in the vicinity of the expanded GAAs in intron 1 of *FXN*. Accordingly, the importance of mismatch repair proteins Msh2 and Msh3, but not Msh6, was underlined in inducing repeat instability in model cell lines containing expanded GAAs [Edward Grabczyck, personal communication as presented at the 4th International Friedreich's Ataxia Conference (<http://www.curefa.org/conference.html>)]. Mismatch repair protein expression also affects intergenerational instability of the GAA repeats in vivo. Indeed, crossing Msh2- or Msh3-knockout mice with YG8R mice (see main text) led to a significant increase in the occurrence of repeat contractions in the offspring compared with YG8R mice, whereas crossing YG8R mice to Msh6 knockouts had the opposite effect, increasing the incidence of expansions [Vahid Ezzatizadeh, personal communication as presented at the 4th International Friedreich's Ataxia Conference (<http://www.curefa.org/conference.html>)]. Similar to prior studies conducted with other trinucleotide repeat sequences (Lin et al., 2009), transcription through the GAA repeat seems to stimulate instability (Ditch et al., 2009). However, contrary to the studies on CTG repeats, the nucleotide excision repair (NER) pathway did not affect GAA repeat instability.

### Further dissecting the molecular consequences of frataxin depletion in models

Many aspects of the molecular pathophysiology of FRDA remain to be addressed using the different mouse models generated. For instance, in both *Prp-CreER<sup>T</sup>* and YG8R mice, additional molecular and cellular investigations are needed to fully understand the process(es) leading to neurodegeneration. Although autophagy has been identified as being involved in the neurodegeneration of large sensory neurons of DRG (Simon et al., 2004; Al-Mahdawi et al., 2006), the molecular and cellular mechanisms leading to this phenomenon are not known.

Although the role of oxidative stress in pathology remains an open controversial question, a clear iron dysregulation (mainly illustrated by mitochondrial iron accumulation) is observed in FRDA (Lamarche et al., 1993; Michael et al., 2006; Koeppen et al., 2007). Understanding the molecular mechanisms involved in such dysregulation, as well as determining the role of this iron accumulation in pathophysiology, is important. Iron chelators are indeed thought to be potential therapeutic agents for FRDA (Richardson, 2003), and deferiprone is currently being tested in clinical trials. Therefore, understanding exactly how frataxin depletion leads to iron dysregulation might help in evaluating the relevance of such therapeutic approaches. Data obtained from the

### Box 2. GAA-expansion-mediated silencing of *FXN*

Expanded GAA tracts confer variegation of expression of a linked transgene in murine cells (Saveliev et al., 2003). This silencing is enhanced by heterochromatin protein 1 (HP1) and is associated with increased nucleosome occupancy in the GAA repeat region. Expanded pathological GAA tracts in cells from individuals with FRDA show increased levels of histone H3 methylation (H3K9me2 and H3K9me3) – which is associated with silenced heterochromatin – and decreased abundance of acetylation at histone H3 and H4 (e.g. H3K14ac, H4K5ac, H4K12ac), which are epigenetic markers for active transcription (Herman et al., 2006). These chromatin changes were detected downstream and upstream of the GAA expansion. The aberrant chromatin status was confirmed in various models, including patient lymphoblast and fibroblast cell lines, iPSCs derived from FRDA patient cells, iPSC-derived neurons, patient autopsy tissues, GAA-based mouse models and genome-integrated transgenes containing long GAA repeats (Gottesfeld, 2007; Greene et al., 2007; Al-Mahdawi et al., 2008; Soragni et al., 2008; Ku et al., 2010; Kim et al., 2011; Sandi et al., 2011). Changes in histone modifications are associated with increased CpG methylation in intron 1 of *FXN* in patient cells (Castaldo et al., 2008). Although the involvement of epigenetic changes in FRDA etiology is undisputed, the exact extent of the epigenetic changes remains unclear. Some results indicate that the expansion predominantly affects transcriptional elongation (Herman et al., 2006; Kim et al., 2011; Punga and Buhler, 2011), which could be attributed to a physical barrier generated by a long polypurine-polypyrimidine sequence and/or by the formation of non-canonical DNA structures. Other data suggest spreading of the heterochromatinization towards the promoter region, consequently affecting the initiation of transcription (De Biase et al., 2009; Kumari et al., 2011). Differences between the results of chromatin immunoprecipitation (ChIP) analyses might arise from great diversity between samples (variation of *FXN* expression from 5% to 30%; size of GAA expansion), as well as inherent variations associated with the ChIP technique. Furthermore, an unusual stalling of RNA polymerase II (RNAPII) in exon 1 of *FXN* was recently identified [Cihangir Yandim, personal communication as presented at the 4th International Friedreich's Ataxia Conference (<http://www.curefa.org/conference.html>)]. Stalled RNAPII was phosphorylated at serine 2, which is a characteristic of the actively elongating enzyme. Although the exact role of the pause site is not clear, stalling of RNAPII was associated with recruitment of the proteasome and the insulator protein CTCF. Analyses of a large patient and control cohort supported by high-throughput second-generation sequencing would help to clarify the extent of epigenetic changes in FRDA cells. These analyses should include RNAPII and CTCF occupancy studies. In addition, the mediator that links GAA expansion with chromatin and DNA methylation changes and triggers the cascade of epigenetic changes has not yet been identified. New evidence suggests the involvement of RNA-mediated transcriptional gene silencing (TGS) initiated by *FXN* mRNA and its antisense counterpart FAST-1 [Yogesh Chutake, personal communication as presented at the 4th International Friedreich's Ataxia Conference (<http://www.curefa.org/conference.html>)]. Future experiments will determine the potential role of dsRNA-mediated TGS in silencing *FXN* expression.

conditional mouse models (*MCK-Cre* and *ALB-Cre*) suggest that the overactivation of iron regulatory protein 1 (IRP1), one of the main cellular regulators of iron metabolism (Hentze et al., 2010), as a direct consequence of Fe-S cluster deficit, could play an essential role in the characteristic iron dysregulation observed in FRDA (Seznec et al., 2005) [Alain Martelli, personal communication, as presented at the 4th International Friedreich's Ataxia Conference (<http://www.curefa.org/conference.html>)]. Therefore, to verify this hypothesis, double *Irf1;Fxn* knockout mice are currently being characterized.

The fact that frataxin deficiency directly affects a general and essential pathway such as Fe-S cluster biogenesis paves the way for new investigations that aim to understand the cellular and

molecular pathophysiology of FRDA. Because Fe-S clusters are essential protein cofactors involved in many cellular pathways (Lill, 2009), abnormal or loss of frataxin function can cause multiple and cumulative cellular dysregulations. Furthermore, determining how exactly the cell senses the frataxin deficit is a challenge that will require expertise in many research areas. Work in this area is currently uncovering new ways by which frataxin deficiency causes FRDA. For example, recent independent data showed that metabolic regulation through lysine acetylation might be a key regulatory process that is affected by frataxin deficiency: increased acetylation of mitochondrial proteins in heart samples of both *NSE-Cre* and *MCK-Cre* models was reported [Gregory Wagner, personal communication, as presented at the 4th International Friedreich's Ataxia Conference (<http://www.curefa.org/conference.html>)]. The origin of the acetylation, as well as its physiological consequences, are still unknown. Accordingly, overexpression of sirtuin 3, a mitochondrial deacetylase enzyme with still unclear function, in 'humanized' murine fibroblast models has a beneficial impact on the FRDA-like phenotype by increasing cell survival and decreasing the sensitivity to oxidative stress [Marcia Haigis, personal communication, as presented at the 4th International Friedreich's Ataxia Conference (<http://www.curefa.org/conference.html>)]. Together, these preliminary results open new avenues as to the regulatory metabolic processes that might be involved in the response to frataxin depletion.

### Reproducing the genetic defect of FRDA in cellular models

Appropriate cell culture models of FRDA are extremely important to uncover the molecular mechanisms of the disease as well as for testing novel therapeutic approaches. Many cellular studies of FRDA pathogenesis were, and are still, conducted using patient-specific immortalized lymphoblasts, primary fibroblasts or peripheral lymphocytes. Although these patient-derived cells recapitulate some molecular features of the disease, including the epigenetic silencing of *FXN* expression (Box 2), they do not develop spontaneous phenotypic characteristics of FRDA (Rotig et al., 1997; Sturm et al., 2005). In an attempt to generate more relevant disease models (i.e. low levels of frataxin expression), different cell lines (fibroblasts, neuronal cell lines, Schwann cells, etc.) have been manipulated to reduce frataxin expression using siRNA- or shRNA-mediated silencing (Santos et al., 2001; Stehling et al., 2004; Napoli et al., 2007; Zanella et al., 2008; Lu et al., 2009). Different, inconsistent phenotypes have been observed in these various cellular models, probably due to the variable knockdown efficiencies (ranging from almost no detectable frataxin expression to about 40% of the residual amount of the protein), pointing to the need for stable and disease-relevant cellular models.

Two strategies have been recently developed for new cellular models of FRDA. The first is based on the exclusive expression in murine fibroblasts of a transgenic human frataxin containing a missense mutation that was identified in compound heterozygous individuals. The second strategy takes advantage of the recent advances in protocols that generate iPSCs from patient fibroblasts.

### 'Humanized' murine fibroblasts

The absence of frataxin in a murine fibroblast cell line, through deletion of the *Fxn*<sup>L3</sup> conditional allele using transient expression



of Cre recombinase, leads to cell death (Calmels et al., 2009). This lethal phenotype can be rescued by stable transfection with a transgene expressing human frataxin or human frataxin bearing various point mutations (G130V, I154F or N146K) prior to the deletion of endogenous *Fxn* (Calmels et al., 2009; Schmucker et al., 2011). Whereas the expression of wild-type human frataxin led to fully functional cells in the absence of endogenous frataxin, cells expressing mutant forms of human frataxin spontaneously displayed characteristics of FRDA, including Fe-S cluster deficit, mitochondrial iron accumulation and deposits, and sensitivity to oxidative stress (Calmels et al., 2009; Schmucker et al., 2011). The severity of the cellular phenotype correlated with the severity of the mutation. Indeed, the phenotype of the cells expressing FXN<sup>G130V</sup>, a mutation that leads to a late-onset form of FRDA, was less severe than that of cells expressing FXN<sup>I154F</sup> (which is associated with a classical form of the disease) (Calmels et al., 2009). A similar approach is currently underway to generate neuronal models using neurospheres derived from conditional mice. Such approaches will help to identify and compare the pathophysiological differences between complete and partial frataxin deficit in the cells that are affected in patients. Furthermore, it will help to evaluate the functional impact of the different missense mutations identified in individuals with FRDA.

This approach could also be used to generate new mouse models. Work with fibroblasts shows, however, that these point mutations can strongly affect cellular function (Calmels et al., 2009; Schmucker et al., 2011), and therefore the mutation used to generate a mouse model with a knock-in, YAC or BAC strategy has to be chosen with caution. Alternatively, viral vectors could be used in the *Fxn*-knockout background to test the effect of the different mutations on the function of a specific tissue.

### Development of iPSC-derived cells

Recently, the ability to derive iPSCs from terminally differentiated human cells was a groundbreaking discovery, with alluring potential for cell-specific disease models, regenerative medicine, modeling physiological developmental processes and drug discovery (Wu and Hochedlinger, 2011). The reprogramming of somatic cells into iPSCs allows for the generation of patient-specific pluripotent cells in a manner that is entirely independent of the availability of embryonic stem cells, thus allowing the generation of multiple cell lines from a large patient pool. The FRDA-iPSC lines will have a tremendous advantage over conventional cellular models by allowing the generation of patient-specific and disease-relevant cell lineages, including neurons and cardiomyocytes.

Several iPSC lines derived from individuals with FRDA have already been generated, using different combinations of reprogramming transcription factors (Oct4, Sox2, Klf4 and Myc; or Oct4, Sox2, Nanog and Lin28) (Ku et al., 2010; Liu et al., 2011) (M.N. and H.P., unpublished data). The initial experimental data showed that these FRDA iPSCs recapitulate some of the molecular genetic aspects of FRDA, including mismatch-repair-dependent repeat expansion (see Box 1), epigenetic silencing of the *FXN* locus (see Box 2) and low levels of frataxin expression. The major focus of FRDA iPSC differentiation research is currently focused on generating appropriate disease-relevant cell types. For example, sensory neurons of the DRG are crucially affected in individuals with FRDA. Neural crest progenitors derived from FRDA iPSCs were successfully

differentiated towards peripheral neurons with reduced levels of frataxin (Liu et al., 2011). Because cardiomyopathy is also a main feature of FRDA, more efficient protocols to obtain cells of the cardiac lineage are currently being developed. Although cardiomyocytes derived from FRDA iPSCs with low levels of frataxin were obtained (Liu et al., 2011) [Marie Wattenhofer-Donzé, personal communication as presented at the 4th International Friedreich's Ataxia Conference (<http://www.curefa.org/conference.html>)], the process is rather inefficient, suggesting that modifications of current protocols and/or the application of different reprogramming strategies that could improve the differentiation potential of the iPSCs are necessary.

Future experiments will show to what extent iPSC-derived cells recapitulate pathological features observed in patient material and animal models. iPSC-based technology will also enable investigation of areas for which currently available FRDA models are not appropriate. For example, the majority of individuals with FRDA suffer from glucose intolerance, and a fraction present with diabetes (Pandolfo, 2009), but the molecular mechanisms leading to metabolic imbalance are unknown. Protocols for differentiating embryonic cells and iPSCs into pancreatic islets have recently been extensively tested (Noguchi, 2010), so FRDA iPSC-derived islet models are likely to be created soon.

Another exciting avenue of iPSC research is the possibility to generate autologous cells for regenerative therapy (Wu and Hochedlinger, 2011). In the case of FRDA, regenerative therapy could be used to correct the cardiac phenotype. Initial attempts to form fully vascularized human cardiac constructs from iPSCs that would be suitable for transplantation demonstrate the great potential for iPSC-based research for future cell-replacement therapy [Greg Dusting, personal communication as presented at the 4th International Friedreich's Ataxia Conference (<http://www.curefa.org/conference.html>)]. However, in parallel with efficient differentiation and tissue development technologies, strategies to genetically correct GAA expansions in FRDA cells need to be developed.

### High-throughput drug screening for FRDA

At the present time, more than ten different therapeutic approaches aimed towards the treatment of FRDA are either entering clinical trials or are already in various stages of testing (details regarding the current status of the Friedreich's Ataxia Treatment Pipeline can be found at <http://www.curefa.org/pipeline.html>). These therapeutic strategies range from iron chelators (deferiprone) and agents used to improve mitochondrial functions (e.g. idebenone or EPI-A0001), to activators of *FXN* expression (e.g. HDAC inhibitors) and approaches designed to increase intracellular levels of frataxin (e.g. cEPO or TAT-frataxin) (reviewed in Tsou et al., 2009; Schmucker and Puccio, 2010).

To search for new FRDA therapeutics, high-throughput drug screening (HTS) approaches have been developed by at least ten research groups (Table 2). A lead compound might target one of several pathological aspects of FRDA, such as the transcriptional silencing of *FXN*, dysregulated iron metabolism or mitochondrial defects. Regardless of the target, the robustness of the HTS assay is fundamental for success.

Because individuals with FRDA carry an intronic GAA expansion on at least one allele, leaving the entire frataxin coding sequence



**Table 2. High-throughput screening for FRDA therapeutics**

| FRDA model                                                                                                     | Readout                            | Activity or function targeted    | Number of compounds screened                       | Hits | References                   |
|----------------------------------------------------------------------------------------------------------------|------------------------------------|----------------------------------|----------------------------------------------------|------|------------------------------|
| Human cells with dual luciferase reporter expression containing <i>FXN</i> minigene with about 800 GAA repeats | Dual luciferase assay              | <i>FXN</i> expression            | 45,640                                             | 1200 | Edward Grabczyka             |
| HEK293 cells expressing luciferase construct with 850 GAA or 30 GAA repeats                                    | Luciferase assay                   | <i>FXN</i> expression            | 360,000 (NIH library)                              | 255  | Marek Napierala <sup>a</sup> |
| Cells expressing the <i>FXN</i> gene with about 300 GAA repeats coupled to luciferase gene                     | Luciferase assay                   | <i>FXN</i> expression            | 88 preselected compounds with HDACi-like structure | 7    | Michele Lufino <sup>a</sup>  |
| HeLa cells expressing the full <i>FXN</i> locus coupled to EGFP                                                | EGFP assay                         | <i>FXN</i> expression            | n.a.                                               | n.a. | Joe Sarsero <sup>a</sup>     |
| Yfh1-depleted yeast                                                                                            | Cell viability (tetrazolium assay) | Sensitivity to oxidative stress  | 242,000 (MLSCN library)                            | 400  | Robert Wilson <sup>a</sup>   |
| Diamide-treated patient fibroblasts                                                                            | Cell viability (calcein-AM assay)  | Sensitivity to diamide treatment | 1060                                               | 40   | Sunil Sahdeo <sup>a</sup>    |

<sup>a</sup>Personal communication, as presented at the 4th International Friedreich's Ataxia Conference (<http://www.curefa.org/conference.html>); HDACi, histone deacetylase inhibitor; MLSCN, Molecular Libraries Screening Centers Network; n.a., information not available; NIH, National Institutes of Health.

intact, the most obvious drug target is the transcriptional silencing of *FXN*. Moreover, as is evident from asymptomatic expansion carriers and the lack of phenotype in KIKO mice (Miranda et al., 2002), a slight increase in *FXN* expression is likely to be therapeutic. In this context, cell-based approaches involving engineered reporter genes (luciferase or EGFP) that contain artificial intronic sequences or are conjugated to *FXN* have been developed for four different HTS approaches aiming to uncover novel compounds capable of frataxin upregulation (Table 2). In line with the molecular features of FRDA, the reporters harboring expanded GAA repeats demonstrated reduced expression of the reporter gene compared with constructs harboring short GAA repeats (Grant et al., 2006; Soragni et al., 2008). In some reporter assays, epigenetic changes in the vicinity of the long GAAs, similar to those found in the *FXN* gene, were detected (see Box 1). An EGFP reporter linked to the entire human *FXN* locus not containing pathogenic GAA expansions was also generated to discover compounds affecting expression of the *FXN* gene (Table 2) (Sarsero et al., 2005).

Finding compounds that alleviate frataxin insufficiency in FRDA cells by stimulating transcription or increasing protein level are not the only objectives of HTS. For example, one of the first HTS approaches for potential FRDA therapeutics was conducted in a yeast strain conditionally deficient in frataxin (Table 2) [Robert Wilson, personal communication as presented at the 4th International Friedreich's Ataxia Conference (<http://www.curefa.org/conference.html>)]. Rescue of the mitochondrial functions of the yeast mutant by a large panel of compounds was monitored using an ultra high-throughput format using the tetrazolium dye WST-1. The identified leads are currently being evaluated in secondary assays using the 'humanized' murine fibroblast model (Calmels et al., 2009). In a similar study, a HTS approach based on the increased sensitivity to diamide (thiol oxidizing compound) of FRDA cells is being developed to uncover small molecules capable of increasing the viability of affected cells (Table 2) [Sunil Sahdeo, personal

communication as presented at the 4th International Friedreich's Ataxia Conference (<http://www.curefa.org/conference.html>)]. Interestingly, a novel computational-based screen was developed to identify lead compounds targeting the ubiquitin-mediated proteasomal degradation of frataxin (Rufini et al., 2011). The lead compounds showed promising results in FRDA lymphocytes.

The majority of screening efforts are currently in the initial phase of assay validation, or are gathering initial results from the HTS and validating primary hits. Thus far, no screens based on the iPSC-derived, disease-relevant cells have been developed. In the future, these approaches will be particularly important for the development of drugs to target the tissue-specific aspects of FRDA pathology.

## Conclusions

A new era in the field of FRDA research and therapeutics is beginning. Although the generation of suitable animal and cellular models for FRDA research has been challenging – in particular because none of the models completely satisfy all aspects of the disease – studies in models have made an enormous contribution to the field and have provided the basis for many potential treatments. The availability in the near future of additional models that more closely reflect the genetic basis of the disease, such as iPSC-derived disease-relevant cells or mice carrying longer GAA expansions, will enable refinements in our understanding of the molecular basis of the disease. Animal and cellular models will continue to be useful in discovering novel therapeutic approaches (both pharmacological and gene replacement) for treating the disease in humans.

Although trial design has been difficult owing to the slowly progressive nature of the disease, clinical trials to test drugs that aim to improve the neurological or cardiac impairment have now commenced (<http://www.curefa.org/pipeline.html>). Despite the lack of positive results of trials to date, FRDA remains an attractive disease target for drug development owing to the significant preclinical advances and the increasing organization of patient

groups, both at the national and international level, promoting collaboration among investigators and the development of necessary clinical trial infrastructures. There is a strong interest in identifying sensitive biomarkers that will enable earlier initiation of treatment. Together with improvements in trial design that take into account the small, diverse patient population and the variable drug-responder rate, the field of FRDA research will undoubtedly see further success in the years to come.

#### ACKNOWLEDGEMENTS

We thank all Friedreich Ataxia patients' associations throughout the world, with a particular thanks to the US Friedreich Ataxia Research Alliance for the financial and logistic support for the 4th International Friedreich's Ataxia Conference held on May 5th-7th in the Institut de Génétique et de Biologie Moléculaire et Cellulaire, Illkirch, France. This conference was also supported by generous financial support from *Disease Models & Mechanisms*.

#### COMPETING INTERESTS

The authors declare that they have no competing or financial interests.

#### FUNDING

This work was supported by the European Commission (EC) [FP7 grant 242193/EFACTS to H.P.].

#### REFERENCES

- Adamec, J., Rusnak, F., Owen, W. G., Naylor, S., Benson, L. M., Gacy, A. M. and Isaya, G. (2000). Iron-dependent self-assembly of recombinant yeast frataxin: implications for Friedreich ataxia. *Am. J. Hum. Genet.* **67**, 549-562.
- Adinolfi, S., Iannuzzi, C., Prischi, F., Pastore, C., Iametti, S., Martin, S. R., Bonomi, F. and Pastore, A. (2009). Bacterial frataxin CyaY is the gatekeeper of iron-sulfur cluster formation catalyzed by IscS. *Nat. Struct. Mol. Biol.* **16**, 390-396.
- Al-Mahdawi, S., Pinto, R. M., Varshney, D., Lawrence, L., Lowrie, M. B., Hughes, S., Webster, Z., Blake, J., Cooper, J. M., King, R. et al. (2006). GAA repeat expansion mutation mouse models of Friedreich ataxia exhibit oxidative stress leading to progressive neuronal and cardiac pathology. *Genomics* **88**, 580-590.
- Al-Mahdawi, S., Pinto, R. M., Ismail, O., Varshney, D., Lymperi, S., Sandi, C., Trabzuni, D. and Pook, M. (2008). The Friedreich ataxia GAA repeat expansion mutation induces comparable epigenetic changes in human and transgenic mouse brain and heart tissues. *Hum. Mol. Genet.* **17**, 735-746.
- Anderson, P. R., Kirby, K., Hilliker, A. J. and Phillips, J. P. (2005). RNAi-mediated suppression of the mitochondrial iron chaperone, frataxin, in *Drosophila*. *Hum. Mol. Genet.* **14**, 3397-3405.
- Babcock, M., de Silva, D., Oaks, R., Davis-Kaplan, S., Jiralerspong, S., Montermini, L., Pandolfo, M. and Kaplan, J. (1997). Regulation of mitochondrial iron accumulation by Yfh1p, a putative homolog of frataxin. *Science* **276**, 1709-1712.
- Bradley, J. L., Homayoun, S., Hart, P. E., Schapira, A. H. and Cooper, J. M. (2004). Role of oxidative damage in Friedreich's ataxia. *Neurochem. Res.* **29**, 561-567.
- Bridwell-Rabb, J., Winn, A. M. and Barondeau, D. P. (2011). Structure-function analysis of Friedreich's ataxia mutants reveals determinants of frataxin binding and activation of the Fe-S assembly complex. *Biochemistry* **50**, 7265-7274.
- Bulteau, A. L., O'Neill, H. A., Kennedy, M. C., Ikeda-Saito, M., Isaya, G. and Swzeda, L. I. (2004). Frataxin acts as an iron chaperone protein to modulate mitochondrial aconitase activity. *Science* **305**, 242-245.
- Calmels, N., Schmucker, S., Wattenhofer-Donze, M., Martelli, A., Vaucamps, N., Reutenauer, L., Messaddeq, N., Bouton, C., Koenig, M. and Puccio, H. (2009). The first cellular models based on frataxin missense mutations that reproduce spontaneously the defects associated with Friedreich ataxia. *PLoS ONE* **4**, e6379.
- Campuzano, V., Montermini, L., Molto, M. D., Pianese, L., Cossee, M., Cavalcanti, F., Monros, E., Rodius, F., Duclos, F., Monticelli, A. et al. (1996). Friedreich's ataxia: autosomal recessive disease caused by an intronic GAA triplet repeat expansion. *Science* **271**, 1423-1427.
- Campuzano, V., Montermini, L., Lutz, Y., Cova, L., Hindelang, C., Jiralerspong, S., Trottier, Y., Kish, S. J., Faucheux, B., Trouillas, P. et al. (1997). Frataxin is reduced in Friedreich ataxia patients and is associated with mitochondrial membranes. *Hum. Mol. Genet.* **6**, 1771-1780.
- Castaldo, I., Pinelli, M., Monticelli, A., Acquaviva, F., Giacchetti, M., Filla, A., Sacchetti, S., Keller, S., Avvedimento, V. E., Chiariotti, L. et al. (2008). DNA methylation in intron 1 of the frataxin gene is related to GAA repeat length and age of onset in Friedreich ataxia patients. *J. Med. Genet.* **45**, 808-812.
- Condo, I., Ventura, N., Malisan, F., Rufini, A., Tomassini, B. and Testi, R. (2007). In vivo maturation of human frataxin. *Hum. Mol. Genet.* **16**, 1534-1540.
- Cook, J. D., Bencze, K. Z., Jankovic, A. D., Crater, A. K., Busch, C. N., Bradley, P. B., Stemmler, A. J., Spaller, M. R. and Stemmler, T. L. (2006). Monomeric yeast frataxin is an iron-binding protein. *Biochemistry* **45**, 7767-7777.
- Cook, J. D., Kondapalli, K. C., Rawat, S., Childs, W. C., Murugesan, Y., Dancis, A. and Stemmler, T. L. (2010). Molecular details of the yeast frataxin-Isu1 interaction during mitochondrial Fe-S cluster assembly. *Biochemistry* **49**, 8756-8765.
- Coppola, G., Marmolino, D., Lu, D., Wang, Q., Cnop, M., Rai, M., Acquaviva, F., Coccozza, S., Pandolfo, M. and Geschwind, D. H. (2009). Functional genomic analysis of frataxin deficiency reveals tissue-specific alterations and identifies the PPARgamma pathway as a therapeutic target in Friedreich's ataxia. *Hum. Mol. Genet.* **18**, 2452-2461.
- Correia, A. R., Pastore, C., Adinolfi, S., Pastore, A. and Gomes, C. M. (2008). Dynamics, stability and iron-binding activity of frataxin clinical mutants. *FEBS J.* **275**, 3680-3690.
- Cossee, M., Schmitt, M., Campuzano, V., Reutenauer, L., Moutou, C., Mandel, J. L. and Koenig, M. (1997). Evolution of the Friedreich's ataxia trinucleotide repeat expansion: founder effect and premutations. *Proc. Natl. Acad. Sci. USA* **94**, 7452-7457.
- Cossee, M., Durr, A., Schmitt, M., Dahl, N., Trouillas, P., Allinson, P., Kostrzewa, M., Nivelon-Chevallier, A., Gustavson, K. H., Kohlschütter, A. et al. (1999). Friedreich's ataxia: point mutations and clinical presentation of compound heterozygotes. *Ann. Neurol.* **45**, 200-206.
- Cossee, M., Puccio, H., Gansmuller, A., Koutnikova, H., Dierich, A., LeMeur, M., Fischbeck, K., Dolle, P. and Koenig, M. (2000). Inactivation of the Friedreich ataxia mouse gene leads to early embryonic lethality without iron accumulation. *Hum. Mol. Genet.* **9**, 1219-1226.
- De Biase, I., Rasmussen, A. and Bidichandani, S. I. (2006). Evolution and instability of the GAA triplet-repeat sequence in Friedreich's ataxia. In *Genetic Instabilities and Neurological Diseases* (ed. R. D. Wells and T. Ashizawa), pp. 305-319. San Diego: Elsevier-Academic Press.
- De Biase, I., Chutake, Y. K., Rindler, P. M. and Bidichandani, S. I. (2009). Epigenetic silencing in Friedreich ataxia is associated with depletion of CTCF (CCCTC-binding factor) and antisense transcription. *PLoS ONE* **4**, e7914.
- Diaz, F., Garcia, S., Hernandez, D., Regev, A., Rebelo, A., Oca-Cossio, J. and Moraes, C. T. (2008). Pathophysiology and fate of hepatocytes in a mouse model of mitochondrial hepatopathies. *Gut* **57**, 232-242.
- Ditch, S., Sammarco, M. C., Banerjee, A. and Grabczyk, E. (2009). Progressive GAA-ITC repeat expansion in human cell lines. *PLoS Genet.* **5**, e1000704.
- Duby, G., Foury, F., Ramazzotti, A., Herrmann, J. and Lutz, T. (2002). A non-essential function for yeast frataxin in iron-sulfur cluster assembly. *Hum. Mol. Genet.* **11**, 2635-2643.
- Emond, M., Lepage, G., Vanasse, M. and Pandolfo, M. (2000). Increased levels of plasma malondialdehyde in Friedreich ataxia. *Neurology* **55**, 1752-1753.
- Foury, F. and Cazzalini, O. (1997). Deletion of the yeast homologue of the human gene associated with Friedreich's ataxia elicits iron accumulation in mitochondria. *FEBS Lett.* **411**, 373-377.
- Gakh, O., Bedekovics, T., Duncan, S. F., Smith, D. Y., IV, Berkholz, D. S. and Isaya, G. (2010). Normal and Friedreich ataxia cells express different isoforms of frataxin with complementary roles in iron-sulfur cluster assembly. *J. Biol. Chem.* **285**, 38486-38501.
- Garcia-Gimenez, J. L., Gimeno, A., Gonzalez-Cabo, P., Dasi, F., Bolinches-Amoros, A., Molla, B., Palau, F. and Pallardo, F. V. (2011). Differential expression of PGC-1alpha and metabolic sensors suggest age-dependent induction of mitochondrial biogenesis in Friedreich ataxia fibroblasts. *PLoS ONE* **6**, e20666.
- Gellera, C., Castellotti, B., Mariotti, C., Mineri, R., Seveso, V., Didonato, S. and Taroni, F. (2007). Frataxin gene point mutations in Italian Friedreich ataxia patients. *Neurogenetics* **8**, 289-299.
- Gerber, J., Mühlenhoff, U. and Lill, R. (2003). An interaction between frataxin and Isu1/Nfs1 that is crucial for Fe/S cluster synthesis on Isu1. *EMBO Rep.* **4**, 906-911.
- Giacomotto, J. and Segalat, L. (2010). High-throughput screening and small animal models, where are we? *Br. J. Pharmacol.* **160**, 204-216.
- Gonzalez-Cabo, P., Vazquez-Manrique, R. P., Garcia-Gimeno, M. A., Sanz, P. and Palau, F. (2005). Frataxin interacts functionally with mitochondrial electron transport chain proteins. *Hum. Mol. Genet.* **14**, 2091-2098.
- Gottesfeld, J. M. (2007). Small molecules affecting transcription in Friedreich ataxia. *Pharmacol. Ther.* **116**, 236-248.
- Grant, L., Sun, J., Xu, H., Subramony, S. H., Chaires, J. B. and Hebert, M. D. (2006). Rational selection of small molecules that increase transcription through the GAA repeats found in Friedreich's ataxia. *FEBS Lett.* **580**, 5399-5405.
- Greene, E., Mahishi, L., Entezam, A., Kumari, D. and Usdin, K. (2007). Repeat-induced epigenetic changes in intron 1 of the frataxin gene and its consequences in Friedreich ataxia. *Nucleic Acids Res.* **35**, 3383-3390.
- Harding, A. E. (1981). Friedreich's ataxia: a clinical and genetic study of 90 families with an analysis of early diagnostic criteria and intrafamilial clustering of clinical features. *Brain* **104**, 589-620.

- Harding, A. E. and Hewer, R. L.** (1983). The heart disease of Friedreich's ataxia: a clinical and electrocardiographic study of 115 patients, with an analysis of serial electrocardiographic changes in 30 cases. *Q. J. Med.* **52**, 489-502.
- He, Y., Alam, S. L., Proteasa, S. V., Zhang, Y., Lesuisse, E., Dancis, A. and Stemmler, T. L.** (2004). Yeast frataxin solution structure, iron binding, and ferrocyclase interaction. *Biochemistry* **43**, 16254-16262.
- Hentze, M. W., Muckenthaler, M. U., Galy, B. and Camaschella, C.** (2010). Two to tango: regulation of mammalian iron metabolism. *Cell* **142**, 24-38.
- Herman, D., Janssen, K., Burnett, R., Soragni, E., Perlman, S. L. and Gottesfeld, J. M.** (2006). Histone deacetylase inhibitors reverse gene silencing in Friedreich's ataxia. *Nat. Chem. Biol.* **2**, 551-558.
- Huynen, M. A., Snel, B., Bork, P. and Gibson, T. J.** (2001). The phylogenetic distribution of frataxin indicates a role in iron-sulfur cluster protein assembly. *Hum. Mol. Genet.* **10**, 2463-2468.
- Iannuzzi, C., Adinolfi, S., Howes, B. D., Garcia-Serres, R., Clemancey, M., Latour, J. M., Smulevich, G. and Pastore, A.** (2011). The role of CyaY in iron sulfur cluster assembly on the E. coli IscU scaffold protein. *PLoS ONE* **6**, e21992.
- Iverson, S. V., Comstock, K. M., Kundert, J. A. and Schmidt, E. E.** (2011). Contributions of new hepatocyte lineages to liver growth, maintenance, and regeneration in mice. *Hepatology* **54**, 655-663.
- Kim, E., Napierala, M. and Dent, S. Y.** (2011). Hyperexpansion of GAA repeats affects post-initiation steps of FXN transcription in Friedreich's ataxia. *Nucleic Acids Res.* **39**, 8366-8377.
- Koepfen, A. H.** (2011). Friedreich's ataxia: pathology, pathogenesis, and molecular genetics. *J. Neurol. Sci.* **303**, 1-12.
- Koepfen, A. H., Michael, S. C., Knutson, M. D., Haile, D. J., Qian, J., Levi, S., Santambrogio, P., Garrick, M. D. and Lamarche, J. B.** (2007). The dentate nucleus in Friedreich's ataxia: the role of iron-responsive proteins. *Acta Neuropathol. (Berl.)* **114**, 163-173.
- Koutnikova, H., Campuzano, V., Foury, F., Dolle, P., Cazzalini, O. and Koenig, M.** (1997). Studies of human, mouse and yeast homologues indicate a mitochondrial function for frataxin. *Nat. Genet.* **16**, 345-351.
- Ku, S., Soragni, E., Campau, E., Thomas, E. A., Altun, G., Laurent, L. C., Loring, J. F., Napierala, M. and Gottesfeld, J. M.** (2010). Friedreich's ataxia induced pluripotent stem cells model intergenerational GAATTC triplet repeat instability. *Cell Stem Cell* **7**, 631-637.
- Kumari, D., Biacsi, R. E. and Usdin, K.** (2011). Repeat expansion affects both transcription initiation and elongation in Friedreich ataxia cells. *J. Biol. Chem.* **286**, 4209-4215.
- Lamarche, J. B., Cote, M. and Lemieux, B.** (1980). The cardiomyopathy of Friedreich's ataxia morphological observations in 3 cases. *Can. J. Neurol. Sci.* **7**, 389-396.
- Lamarche, J., Shapcott, D., Côté, M. and Lemieux, B.** (1993). Cardiac Iron Deposits in Friedreich's Ataxia. In *Handbook of Cerebellar Diseases* (ed. R. Lechtenberg), pp. 453-457. Newark: Dekker, M.
- Layer, G., Ollagnier-de Choudens, S., Sanakis, Y. and Fontecave, M.** (2006). Iron-sulfur cluster biosynthesis: characterization of Escherichia coli CyaY as an iron donor for the assembly of [2Fe-2S] clusters in the scaffold IscU. *J. Biol. Chem.* **281**, 16256-16263.
- Li, D. S., Ohshima, K., Jiralerspong, S., Bojanowski, M. W. and Pandolfo, M.** (1999). Knock-out of the cyaY gene in Escherichia coli does not affect cellular iron content and sensitivity to oxidants. *FEBS Lett.* **456**, 13-16.
- Li, H., Gakh, O., Smith, D. Y., IV and Isaya, G.** (2009). Oligomeric yeast frataxin drives assembly of core machinery for mitochondrial iron-sulfur cluster synthesis. *J. Biol. Chem.* **284**, 21971-21980.
- Lill, R.** (2009). Function and biogenesis of iron-sulphur proteins. *Nature* **460**, 831-838.
- Lin, Y., Hubert, L., Jr and Wilson, J. H.** (2009). Transcription destabilizes triplet repeats. *Mol. Carcinog.* **48**, 350-361.
- Liu, Y., Verma, P. J., Evans-Galea, M. V., Delatycki, M. B., Michalska, A., Leung, J., Crombie, D., Sarsero, J. P., Williamson, R., Dottori, M. et al.** (2011). Generation of induced pluripotent stem cell lines from Friedreich ataxia patients. *Stem Cell Rev.* **7**, 703-713.
- Llorens, J. V., Navarro, J. A., Martinez-Sebastian, M. J., Baylies, M. K., Schneuwly, S., Botella, J. A. and Molto, M. D.** (2007). Causative role of oxidative stress in a Drosophila model of Friedreich ataxia. *FASEB J.* **21**, 333-344.
- Lu, C., Schoenfeld, R., Shan, Y., Tsai, H. J., Hammock, B. and Cortopassi, G.** (2009). Frataxin deficiency induces Schwann cell inflammation and death. *Biochim. Biophys. Acta* **1792**, 1052-1061.
- Marmolino, D., Manto, M., Acquaviva, F., Vergara, P., Ravella, A., Monticelli, A. and Pandolfo, M.** (2010). PGC-1alpha down-regulation affects the antioxidant response in Friedreich's ataxia. *PLoS ONE* **5**, e10025.
- Michael, S., Petrocine, S. V., Qian, J., Lamarche, J. B., Knutson, M. D., Garrick, M. D. and Koepfen, A. H.** (2006). Iron and iron-responsive proteins in the cardiomyopathy of Friedreich's ataxia. *Cerebellum* **5**, 257-267.
- Miranda, C. J., Santos, M. M., Ohshima, K., Smith, J., Li, L., Bunting, M., Cossee, M., Koenig, M., Sequeiros, J., Kaplan, J. et al.** (2002). Frataxin knockin mouse. *FEBS Lett.* **512**, 291-297.
- Montermini, L., Kish, S. J., Jiralerspong, S., Lamarche, J. B. and Pandolfo, M.** (1997). Somatic mosaicism for Friedreich's ataxia GAA triplet repeat expansions in the central nervous system. *Neurology* **49**, 606-610.
- Muhlenhoff, U., Richhardt, N., Ristow, M., Kispal, G. and Lill, R.** (2002). The yeast frataxin homolog Yfh1p plays a specific role in the maturation of cellular Fe/S proteins. *Hum. Mol. Genet.* **11**, 2025-2036.
- Nair, M., Adinolfi, S., Pastore, C., Kelly, G., Temussi, P. and Pastore, A.** (2004). Solution structure of the bacterial frataxin ortholog, CyaY: mapping the iron binding sites. *Structure* **12**, 2037-2048.
- Napoli, E., Morin, D., Bernhardt, R., Buckpitt, A. and Cortopassi, G.** (2007). Hemin rescues adrenodoxin, heme a and cytochrome oxidase activity in frataxin-deficient oligodendroglia cells. *Biochim. Biophys. Acta* **1772**, 773-780.
- Noguchi, H.** (2010). Production of pancreatic beta-cells from stem cells. *Curr. Diabetes Rev.* **6**, 184-190.
- Pandolfo, M.** (2009). Friedreich ataxia: the clinical picture. *J. Neurol.* **256 Suppl.** **1**, 3-8.
- Pollard, L. M., Sharma, R., Gomez, M., Shah, S., Delatycki, M. B., Pianese, L., Monticelli, A., Keats, B. J. and Bidichandani, S. I.** (2004). Replication-mediated instability of the GAA triplet repeat mutation in Friedreich ataxia. *Nucleic Acids Res.* **32**, 5962-5971.
- Prischi, F., Giannini, C., Adinolfi, S. and Pastore, A.** (2009). The N-terminus of mature human frataxin is intrinsically unfolded. *FEBS J.* **276**, 6669-6676.
- Prischi, F., Konarev, P. V., Iannuzzi, C., Pastore, C., Adinolfi, S., Martin, S. R., Svergun, D. I. and Pastore, A.** (2010). Structural bases for the interaction of frataxin with the central components of iron-sulphur cluster assembly. *Nat. Commun.* **1**, 95.
- Puccio, H., Simon, D., Cossee, M., Criqui-Filipe, P., Tiziano, F., Melki, J., Hindelang, C., Matyas, R., Rustin, P. and Koenig, M.** (2001). Mouse models for Friedreich ataxia exhibit cardiomyopathy, sensory nerve defect and Fe-S enzyme deficiency followed by intramitochondrial iron deposits. *Nat. Genet.* **27**, 181-186.
- Punga, T. and Buhler, M.** (2011). Long intronic GAA repeats causing Friedreich ataxia impede transcription elongation. *EMBO Mol. Med.* **2**, 120-129.
- Regner, S. R., Lagedrost, S. J., Plappert, T., Paulsen, E. K., Friedman, L. S., Snyder, M. L., Perlman, S. L., Mathews, K. D., Wilmot, G. R., Schadt, K. A. et al.** (2011). Analysis of echocardiograms in a large heterogeneous cohort of patients with Friedreich ataxia. *Am. J. Cardiol.* [Epub ahead of print] doi:10.1016/j.amjcard.2011.09.025.
- Richardson, D. R.** (2003). Friedreich's ataxia: iron chelators that target the mitochondrion as a therapeutic strategy? *Expert Opin. Investig. Drugs* **12**, 235-245.
- Ristow, M., Mulder, H., Pomplun, D., Schulz, T. J., Muller-Schmehl, K., Krause, A., Fex, M., Puccio, H., Muller, J., Isken, F. et al.** (2003). Frataxin deficiency in pancreatic islets causes diabetes due to loss of beta cell mass. *J. Clin. Invest.* **112**, 527-534.
- Rotig, A., de Lonlay, P., Chretien, D., Foury, F., Koenig, M., Sidi, D., Munnich, A. and Rustin, P.** (1997). Aconitase and mitochondrial iron-sulphur protein deficiency in Friedreich ataxia. *Nat. Genet.* **17**, 215-217.
- Rouault, T.** (2012). Biogenesis of iron-sulfur clusters in mammalian cells: new insights and relevance to human disease. *Dis. Model. Mech.* **5**, 155-164.
- Rufini, A., Fortuni, S., Arcuri, G., Condo, I., Serio, D., Incani, O., Malisan, F., Ventura, N. and Testi, R.** (2011). Preventing the ubiquitin-proteasome-dependent degradation of frataxin, the protein defective in Friedreich's ataxia. *Hum. Mol. Genet.* **20**, 1253-1261.
- Sandi, C., Pinto, R. M., Al-Mahdawi, S., Ezzatizadeh, V., Barnes, G., Jones, S., Rusche, J. R., Gottesfeld, J. M. and Pook, M. A.** (2011). Prolonged treatment with pimelic o-aminobenzamide HDAC inhibitors ameliorates the disease phenotype of a Friedreich ataxia mouse model. *Neurobiol. Dis.* **42**, 496-505.
- Santos, M. M., Ohshima, K. and Pandolfo, M.** (2001). Frataxin deficiency enhances apoptosis in cells differentiating into neuroectoderm. *Hum. Mol. Genet.* **10**, 1935-1944.
- Sarsero, J. P., Holloway, T. P., Li, L., McLenachan, S., Fowler, K. J., Bertonecello, I., Voullaire, L., Gazeas, S. and Ioannou, P. A.** (2005). Evaluation of an FRDA-EGFP genomic reporter assay in transgenic mice. *Mamm. Genome* **16**, 228-241.
- Saveliev, A., Everett, C., Sharpe, T., Webster, Z. and Festenstein, R.** (2003). DNA triplet repeats mediate heterochromatin-protein-1-sensitive variegated gene silencing. *Nature* **422**, 909-913.
- Schmucker, S. and Puccio, H.** (2010). Understanding the molecular mechanisms of Friedreich's ataxia to develop therapeutic approaches. *Hum. Mol. Genet.* **19**, R103-R110.
- Schmucker, S., Argentini, M., Carelle-Calmels, N., Martelli, A. and Puccio, H.** (2008). The in vivo mitochondrial two-step maturation of human frataxin. *Hum. Mol. Genet.* **17**, 3521-3531.
- Schmucker, S., Martelli, A., Colin, F., Page, A., Wattenhofer-Donze, M., Reutenauer, L. and Puccio, H.** (2011). Mammalian frataxin: an essential function for cellular



- viability through an interaction with a preformed ISCU/NFS1/ISD11 iron-sulfur assembly complex. *PLoS ONE* **6**, e16199.
- Schulz, J. B., Dehmer, T., Schols, L., Mende, H., Hardt, C., Vorgerd, M., Burk, K., Matson, W., Dichgans, J., Beal, M. F. et al.** (2000). Oxidative stress in patients with Friedreich ataxia. *Neurology* **55**, 1719-1721.
- Seznec, H., Simon, D., Monassier, L., Criqui-Filipe, P., Gansmuller, A., Rustin, P., Koenig, M. and Puccio, H.** (2004). Idebeneone delays the onset of cardiac functional alteration without correction of Fe-S enzymes deficit in a mouse model for Friedreich ataxia. *Hum. Mol. Genet.* **13**, 1017-1024.
- Seznec, H., Simon, D., Bouton, C., Reutenauer, L., Hertzog, A., Golik, P., Procaccio, V., Patel, M., Drapier, J. C., Koenig, M. et al.** (2005). Friedreich ataxia: the oxidative stress paradox. *Hum. Mol. Genet.* **14**, 463-474.
- Shan, Y., Napoli, E. and Cortopassi, G.** (2007). Mitochondrial frataxin interacts with ISD11 of the NFS1/ISCU complex and multiple mitochondrial chaperones. *Hum. Mol. Genet.* **16**, 929-941.
- Sharma, R., Bhatti, S., Gomez, M., Clark, R. M., Murray, C., Ashizawa, T. and Bidichandani, S. I.** (2002). The GAA triplet-repeat sequence in Friedreich ataxia shows a high level of somatic instability in vivo, with a significant predilection for large contractions. *Hum. Mol. Genet.* **11**, 2175-2187.
- Simon, D., Seznec, H., Gansmuller, A., Carelle, N., Weber, P., Metzger, D., Rustin, P., Koenig, M. and Puccio, H.** (2004). Friedreich ataxia mouse models with progressive cerebellar and sensory ataxia reveal autophagic neurodegeneration in dorsal root ganglia. *J. Neurosci.* **24**, 1987-1995.
- Soragni, E., Herman, D., Dent, S. Y., Gottesfeld, J. M., Wells, R. D. and Napierala, M.** (2008). Long intronic GAA\*TTC repeats induce epigenetic changes and reporter gene silencing in a molecular model of Friedreich ataxia. *Nucleic Acids Res.* **36**, 6056-6065.
- Stehling, O., Elsasser, H. P., Bruckel, B., Muhlenhoff, U. and Lill, R.** (2004). Iron-sulfur protein maturation in human cells: evidence for a function of frataxin. *Hum. Mol. Genet.* **13**, 3007-3015.
- Sturm, B., Bistrich, U., Schranzhofer, M., Sarsero, J. P., Rauen, U., Scheiber-Mojdehkar, B., de Groot, H., Ioannou, P. and Petrat, F.** (2005). Friedreich's ataxia, no changes in mitochondrial labile iron in human lymphoblasts and fibroblasts: a decrease in antioxidative capacity? *J. Biol. Chem.* **280**, 6701-6708.
- Thierbach, R., Schulz, T. J., Isken, F., Voigt, A., Mietzner, B., Drewes, G., von Kleist-Retzow, J. C., Wiesner, R. J., Magnuson, M. A., Puccio, H. et al.** (2005). Targeted disruption of hepatic frataxin expression causes impaired mitochondrial function, decreased life span and tumor growth in mice. *Hum. Mol. Genet.* **14**, 3857-3864.
- Thierbach, R., Drewes, G., Fusser, M., Voigt, A., Kuhlow, D., Blume, U., Schulz, T. J., Reiche, C., Glatt, H., Epe, B. et al.** (2010). The Friedreich's ataxia protein frataxin modulates DNA base excision repair in prokaryotes and mammals. *Biochem. J.* **432**, 165-172.
- Thierbach, R., Florian, S., Wolfrum, K., Voigt, A., Drewes, G., Blume, U., Bannasch, P., Ristow, M. and Steinberg, P.** (2012). Specific alterations of carbohydrate metabolism are associated with hepatocarcinogenesis in mitochondrially impaired mice. *Hum. Mol. Genet.* (in press).
- Tsai, C. L. and Barondeau, D. P.** (2010). Human frataxin is an allosteric switch that activates the Fe-S cluster biosynthetic complex. *Biochemistry* **49**, 9132-9139.
- Tsai, C. L., Bridwell-Rabb, J. and Barondeau, D. P.** (2011). Friedreich's ataxia variants I154F and W155R diminish frataxin-based activation of the iron-sulfur cluster assembly complex. *Biochemistry* **50**, 6478-6487.
- Tsou, A. Y., Friedman, L. S., Wilson, R. B. and Lynch, D. R.** (2009). Pharmacotherapy for Friedreich ataxia. *CNS Drugs* **23**, 213-223.
- Vazquez-Manrique, R. P., Gonzalez-Cabo, P., Ros, S., Aziz, H., Baylis, H. A. and Palau, F.** (2006). Reduction of *Caenorhabditis elegans* frataxin increases sensitivity to oxidative stress, reduces lifespan, and causes lethality in a mitochondrial complex II mutant. *FASEB J.* **20**, 172-174.
- Ventura, N., Rea, S. L. and Testi, R.** (2006). Long-lived *C. elegans* mitochondrial mutants as a model for human mitochondrial-associated diseases. *Exp. Gerontol.* **41**, 974-991.
- Wu, S. M. and Hochedlinger, K.** (2011). Harnessing the potential of induced pluripotent stem cells for regenerative medicine. *Nat. Cell Biol.* **13**, 497-505.
- Yoon, H., Golla, R., Lesuisse, E., Pain, J., Donald, J., Lyver, E. R., Pain, D. and Dancis, A.** (2012). Mutation in Fe-S scaffold Isu bypasses frataxin deletion. *Biochem J.* **441**, 473-480.
- Yoon, T. and Cowan, J. A.** (2003). Iron-sulfur cluster biosynthesis. Characterization of frataxin as an iron donor for assembly of [2Fe-2S] clusters in ISU-type proteins. *J. Am. Chem. Soc.* **125**, 6078-6084.
- Yoon, T. and Cowan, J. A.** (2004). Frataxin-mediated iron delivery to ferrochelatase in the final step of heme biosynthesis. *J. Biol. Chem.* **279**, 25943-25946.
- Zanella, I., Derosas, M., Corrado, M., Cocco, E., Cavadini, P., Biasiotto, G., Poli, M., Verardi, R. and Arosio, P.** (2008). The effects of frataxin silencing in HeLa cells are rescued by the expression of human mitochondrial ferritin. *Biochim. Biophys. Acta* **1782**, 90-98.
- Zarse, K., Schulz, T. J., Birringer, M. and Ristow, M.** (2007). Impaired respiration is positively correlated with decreased life span in *Caenorhabditis elegans* models of Friedreich Ataxia. *FASEB J.* **21**, 1271-1275.
